# Supplementary material for: Conductive casting films based on an octasilicate-core dendrimer containing the mixed-valence state TCNQ on the periphery
Source: Royal Society of Chemistry journal article supplement (doi:10.1039/c6ra21636f), 2016-01-01
Supplement: c6ra21636f1.pdf [file c6ra21636f1.pdf]

**Supporting Information**

**Conductive Casting Films Based on an Octasilicate-Core  
Dendrimer Containing the Mixed-Valence State TCNQ on  
the Periphery**

Yasuyuki Irie, Li Lina, Hiroaki Imoto, Megumi Komada, Takashi Nishino,  
and Kensuke Naka

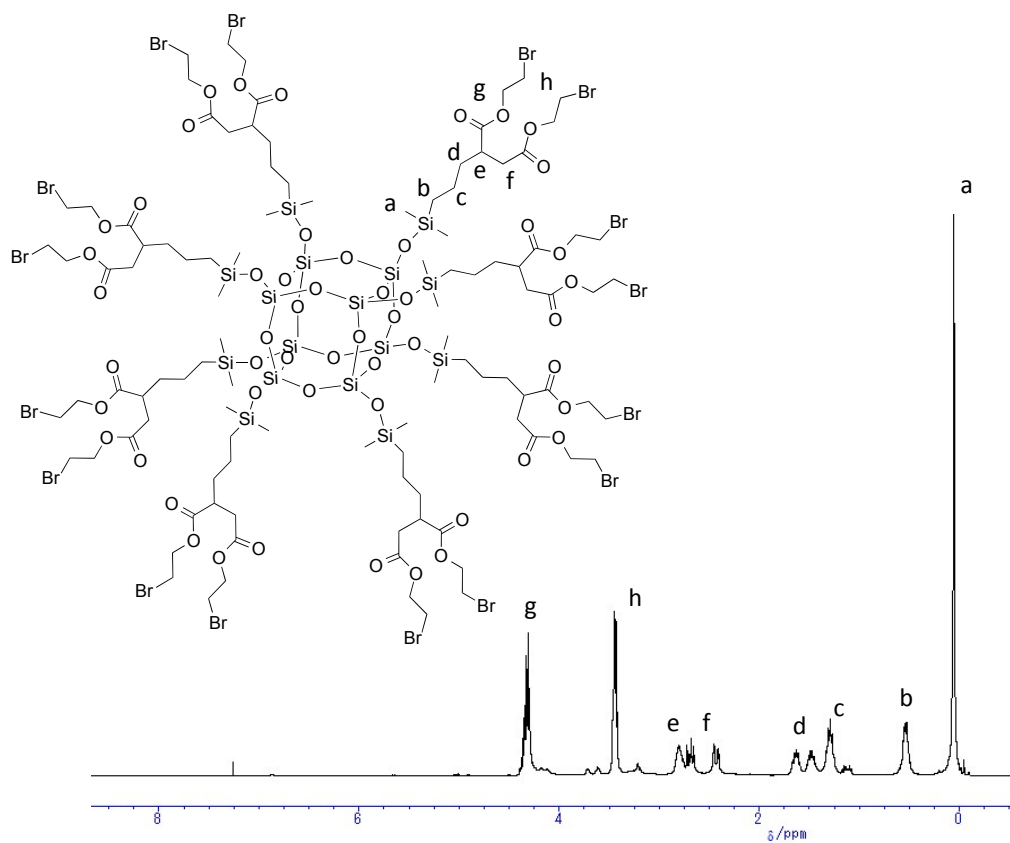

Figure S1  $^1\text{H}$ -NMR spectrum of OS-Br in  $\text{CDCl}_3$

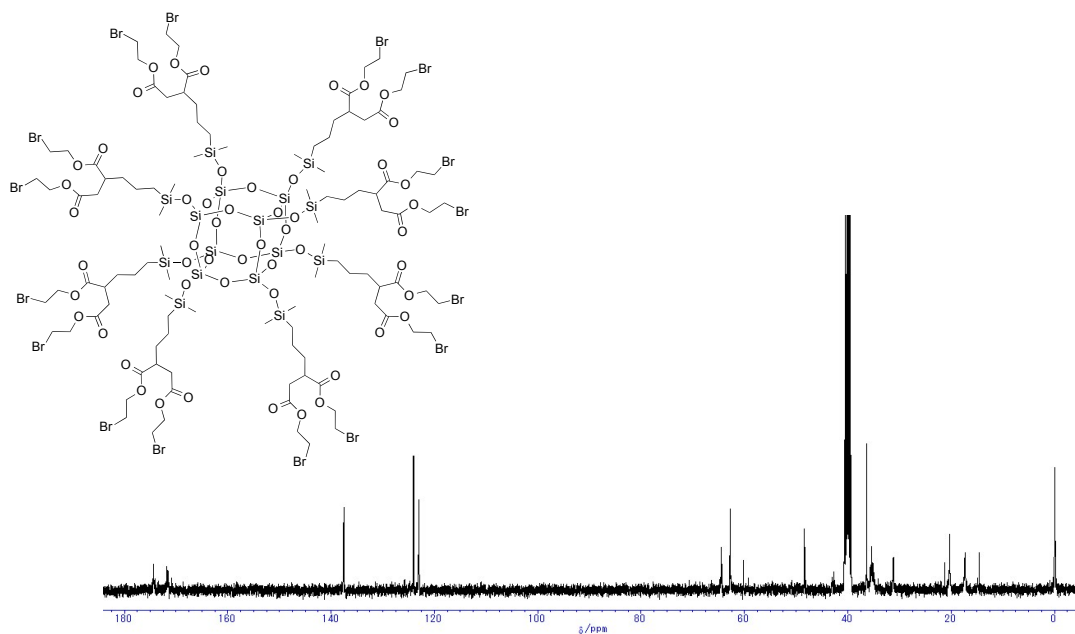

Figure S2  $^{13}\text{C}$ -NMR spectrum of OS-Br in  $\text{CDCl}_3$

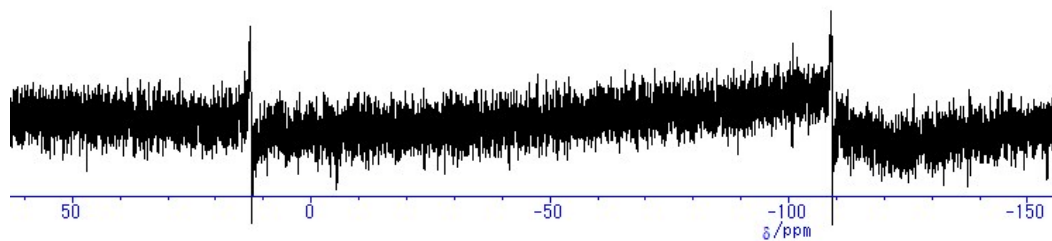

Figure S3  $^{29}\text{Si}$ -NMR spectrum of OS-Br in  $\text{CDCl}_3$

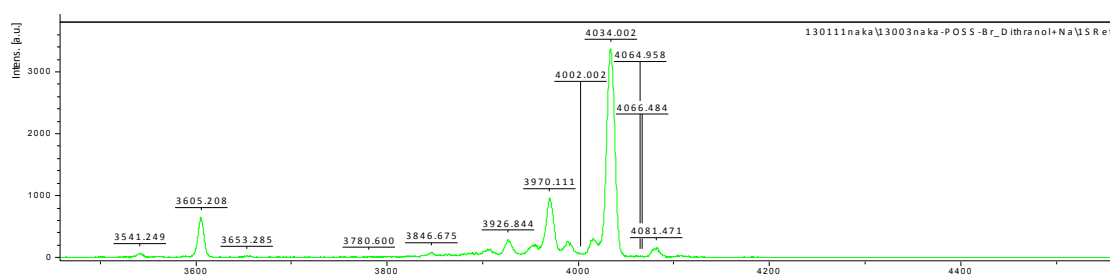

Figure S4 MALDI TOF-MS spectrum of OS-Br.

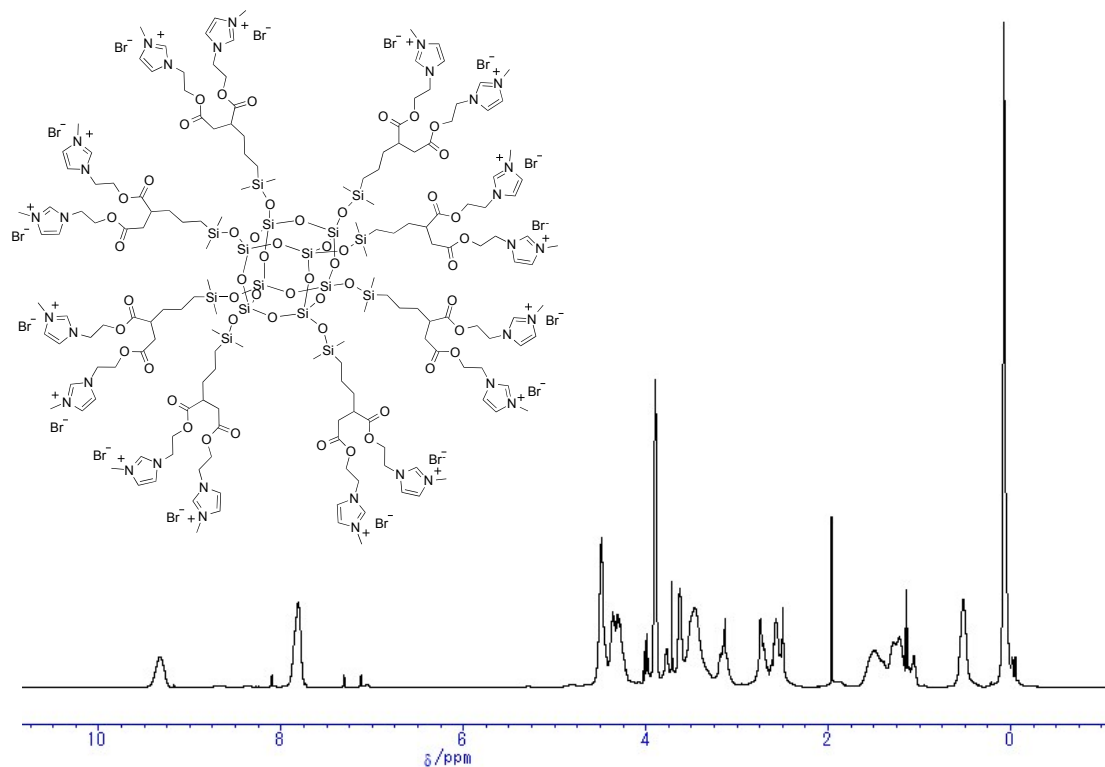

Figure S5  $^1\text{H}$ -NMR spectrum of OS-mimBr in  $\text{DMSO}-d_6$

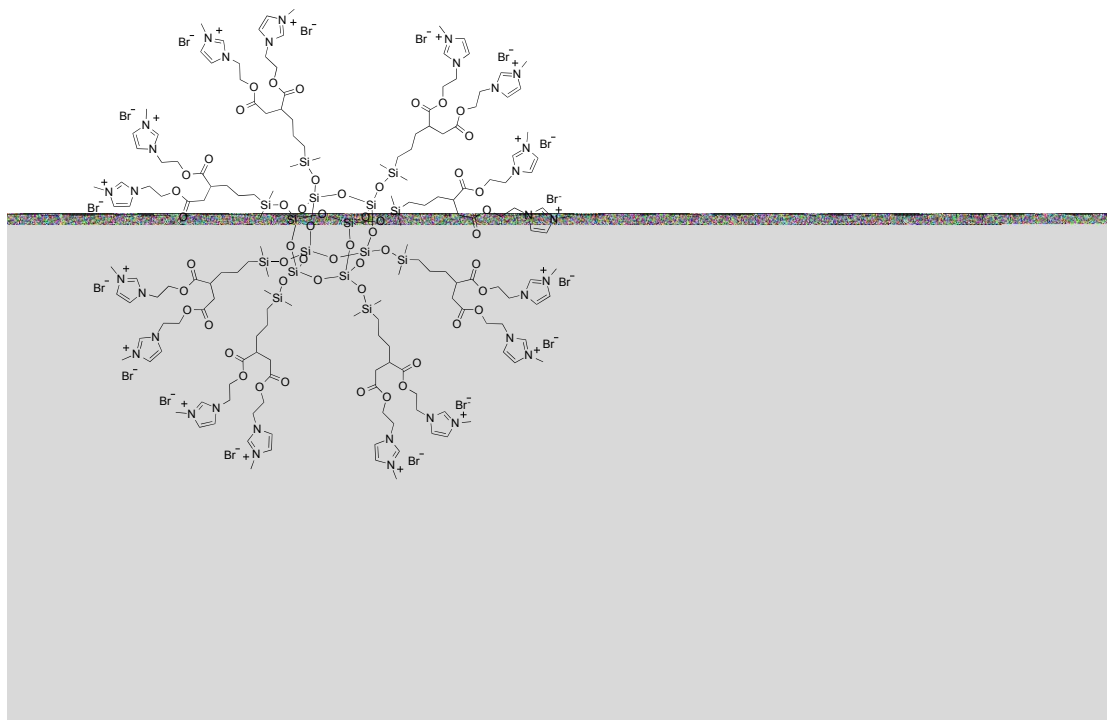

**Figure S6**  $^{13}\text{C}$ -NMR spectrum of OS-mimBr in  $\text{DMSO-}d_6$

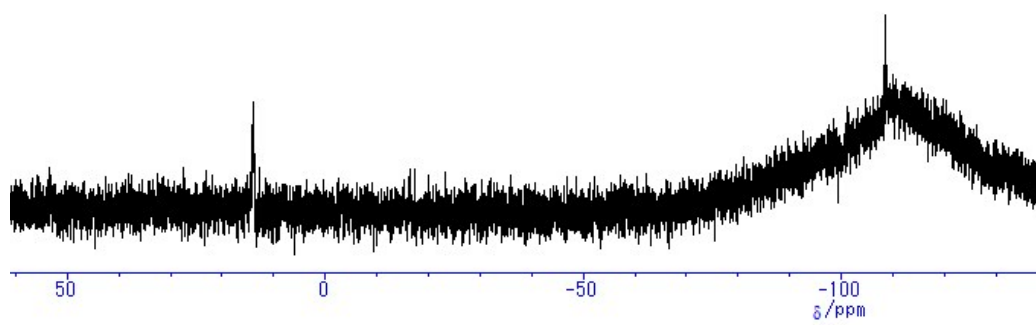

**Figure S7**  $^{29}\text{Si}$ -NMR spectrum of OS-mimBr in  $\text{DMSO-}d_6$

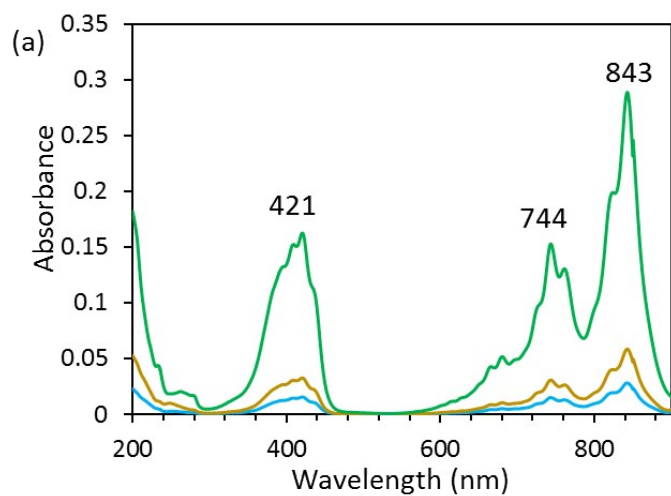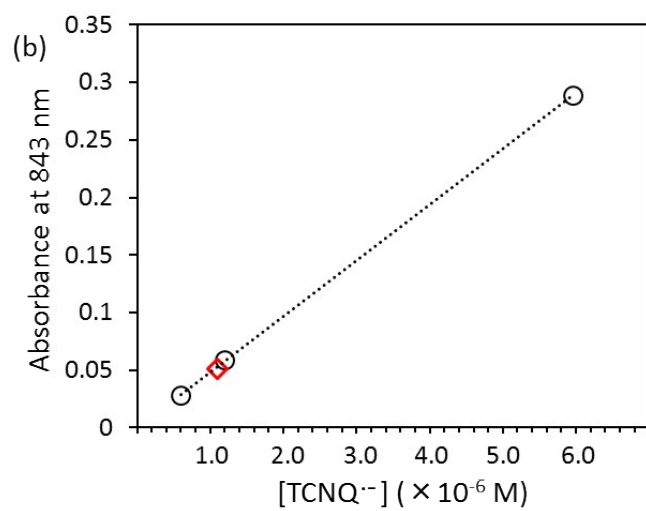

**Figure S8.** (a) UV-vis spectra of **PmimTCNQ** ( $5.95 \times 10^{-7}$  M; blue,  $1.19 \times 10^{-6}$  M; yellow,  $5.95 \times 10^{-6}$  M; green) in  $\text{CHCl}_3$ , (b) the calibration curve using absorbance of **PmimTCNQ** at 843 nm (○) and the absorbance of prepared **OS-mimTCNQ** at 843 nm (◇).

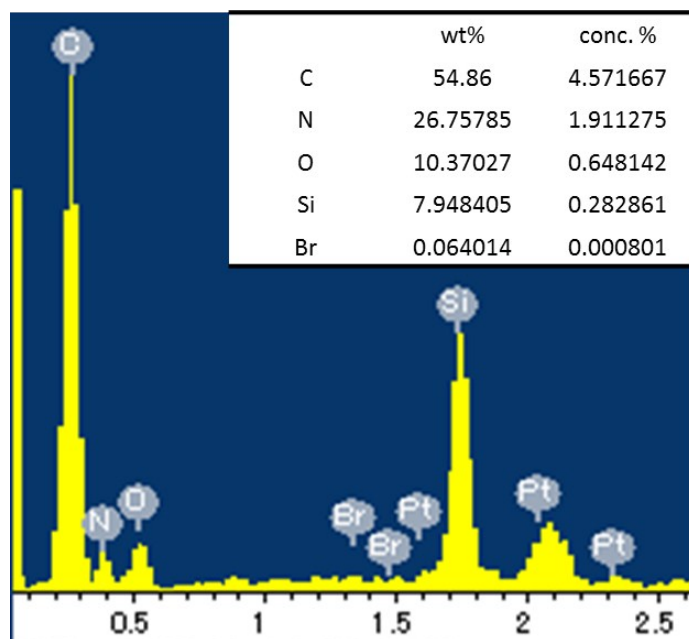

**Figure S9.** EDX analysis of OS-mimTCNQ.

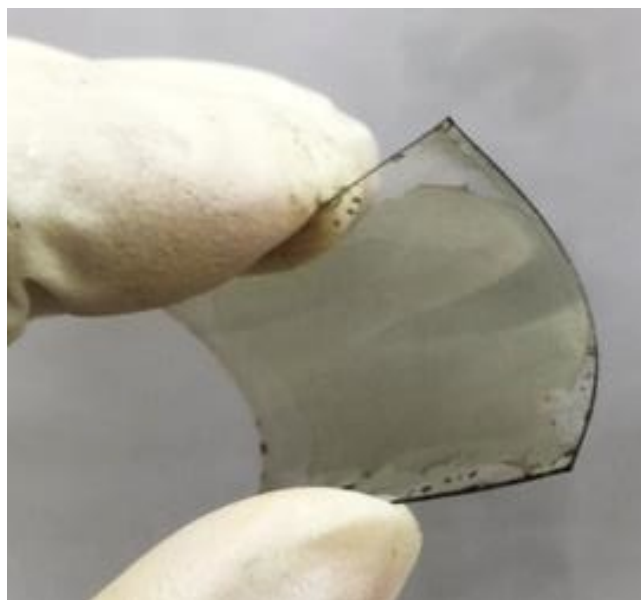

**Figure S10.** Photograph of OS-CT<sub>1.0</sub> on a polyvinyl chloride film.

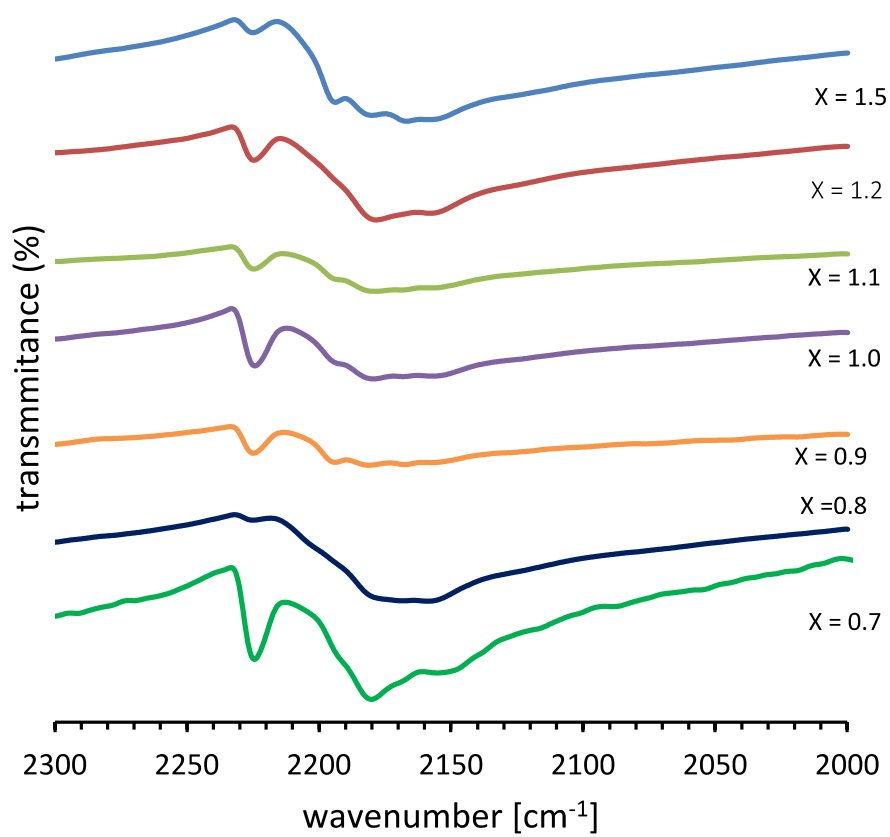

**Figure S11.** FT-IR spectra of OS-CT<sub>x</sub> (X = 0.7, 0.8, 0.9, 1.0, 1.1, 1.2, and 1.5).

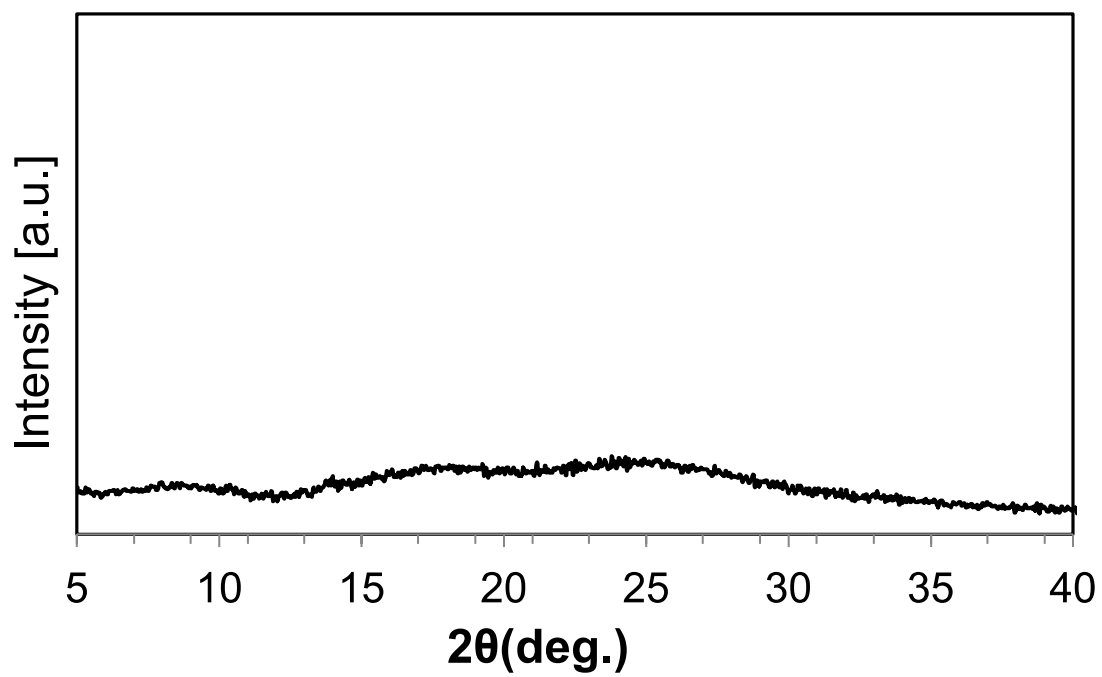

**Figure S12.** XRD pattern of OS-mimTCNQ.
